# Supplementary material
Source: MDPI journal article supplement (https://www.mdpi.com/2072-4292/14/13/3107)
Supplement: s1 [file s1]

# Monitoring and Predicting Channel Morphology of the Tongtian River, Headwater of the Yangtze River using Landsat images and Lightweight Neural Network

Bin Deng <sup>1,2,3</sup>, Kai Xiong <sup>1</sup>, Zhiyong Huang <sup>1,2,3,\*</sup>, Changbo Jiang <sup>1,2,3</sup>, Jiang Liu <sup>1</sup>, Wei Luo <sup>1</sup> and Yifei Xiang <sup>4</sup>

<sup>1</sup> School of Hydraulic and Environmental Engineering, Changsha University of Science & Technology, Changsha 410114, China; dengbin07@csust.edu.cn

<sup>2</sup> Key Laboratory of Dongting Lake Aquatic Eco-Environmental Control and Restoration of Hunan Province, Changsha 410114, China

<sup>3</sup> Key Laboratory of Water-Sediment Sciences and Water Disaster Prevention of Hunan Province, Changsha 410114, China

<sup>4</sup> College of Artificial Intelligence, Guangxi Minzu University, Nanning Guangxi 530006, China

\* Correspondence: huangzy9084@csust.edu.cn

## Content:

**Table S1.** Paths and rows of satellite images covered by Landsat in the study region. .... 2

**Table S2.** Product description of remote sensing data. .... 2

**Figure S1 .** Maps showing channel morphology dynamics for the main braided Reach A of the Tongtian River during three periods, i.e., 1990-2000 (a), 2000-2010 (b), 2010-2020 (c)..... 2

**Figure S2.** The same as Figure S1, but for the main braided Reach B. .... 3

**Figure S3.** The same as Figure S1, but for the main braided Reach C. .... 4

**Figure S4.** The same as Figure S1, but for the minor braided Reach D. A local part highlighted in a colored rectangle is enlarged in an inserted map with a rectangle in the same color. .... 5

**Figure S5.** The same as Figure S4, but for the main meandering Reach E..... 6

**Figure S6.** The same as Figure S4, but for the main meandering Reach F. Only the map during 1990-2000 is shown here..... 7

**Figure S7.** The same as Figure S4, but for the minor meandering Reach G. .... 8

**Table S1.** Paths and rows of satellite images covered by Landsat in the study region.

| Path | Row |
|------|-----|
| 134  | 37  |
| 135  | 36  |
| 135  | 37  |
| 136  | 36  |
| 136  | 37  |
| 137  | 36  |
| 137  | 37  |

**Table S2.** Product description of remote sensing data.

| Data Product        | Time Span        | Number of images |
|---------------------|------------------|------------------|
| Landsat4-5 TM       | 1987.12-1999.07  | 223              |
| Landsat7 ETM SLC-on | 1999.07 -2013.06 | 526              |
| Landsat8 OLI_TIRS   | 2013.06 -2021.12 | 359              |

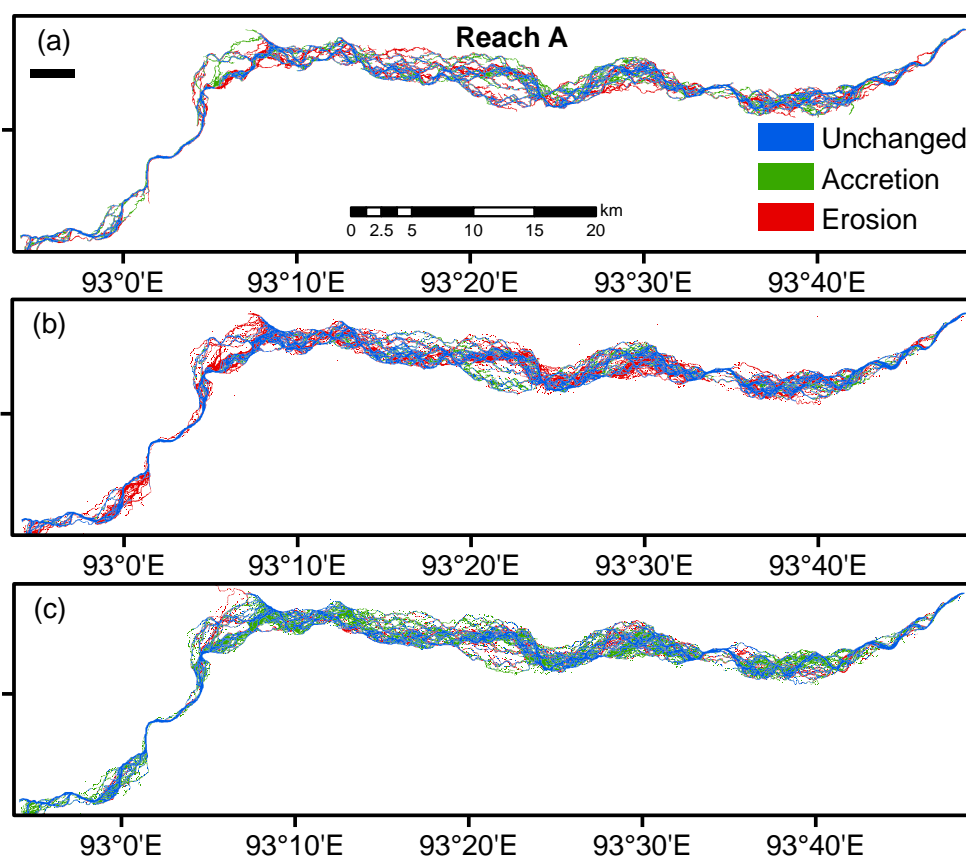**Figure S1 .** Maps showing channel morphology dynamics for the main braided Reach A of the Tongtian River during three periods, i.e., 1990-2000 (a), 2000-2010 (b), 2010-2020 (c).

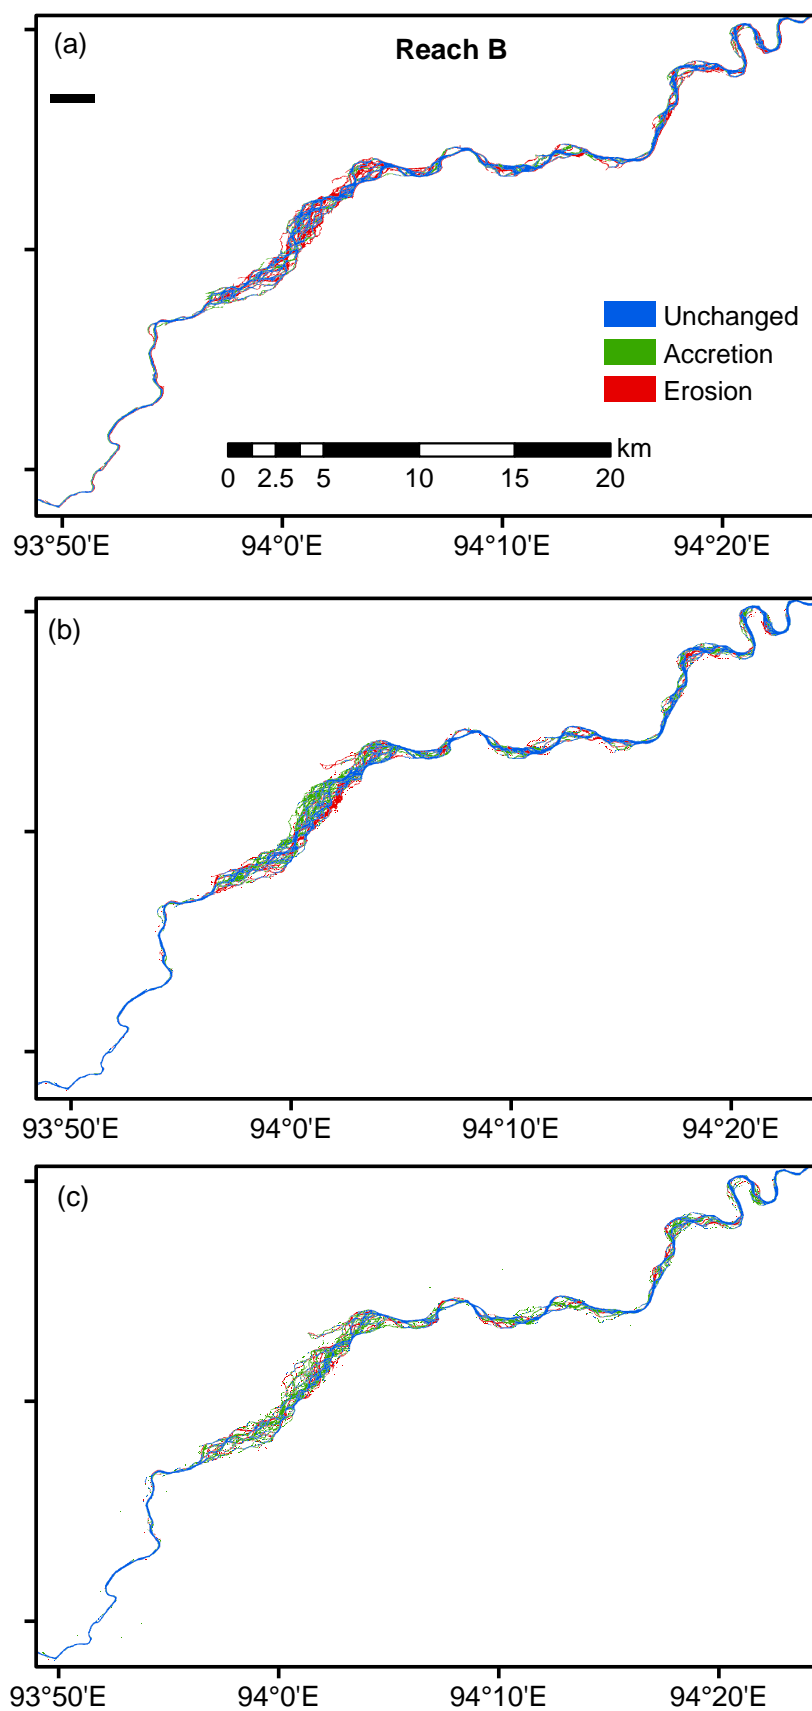

**Figure S2.** (a-c) The same as Figure S1, but for the main braided Reach B.

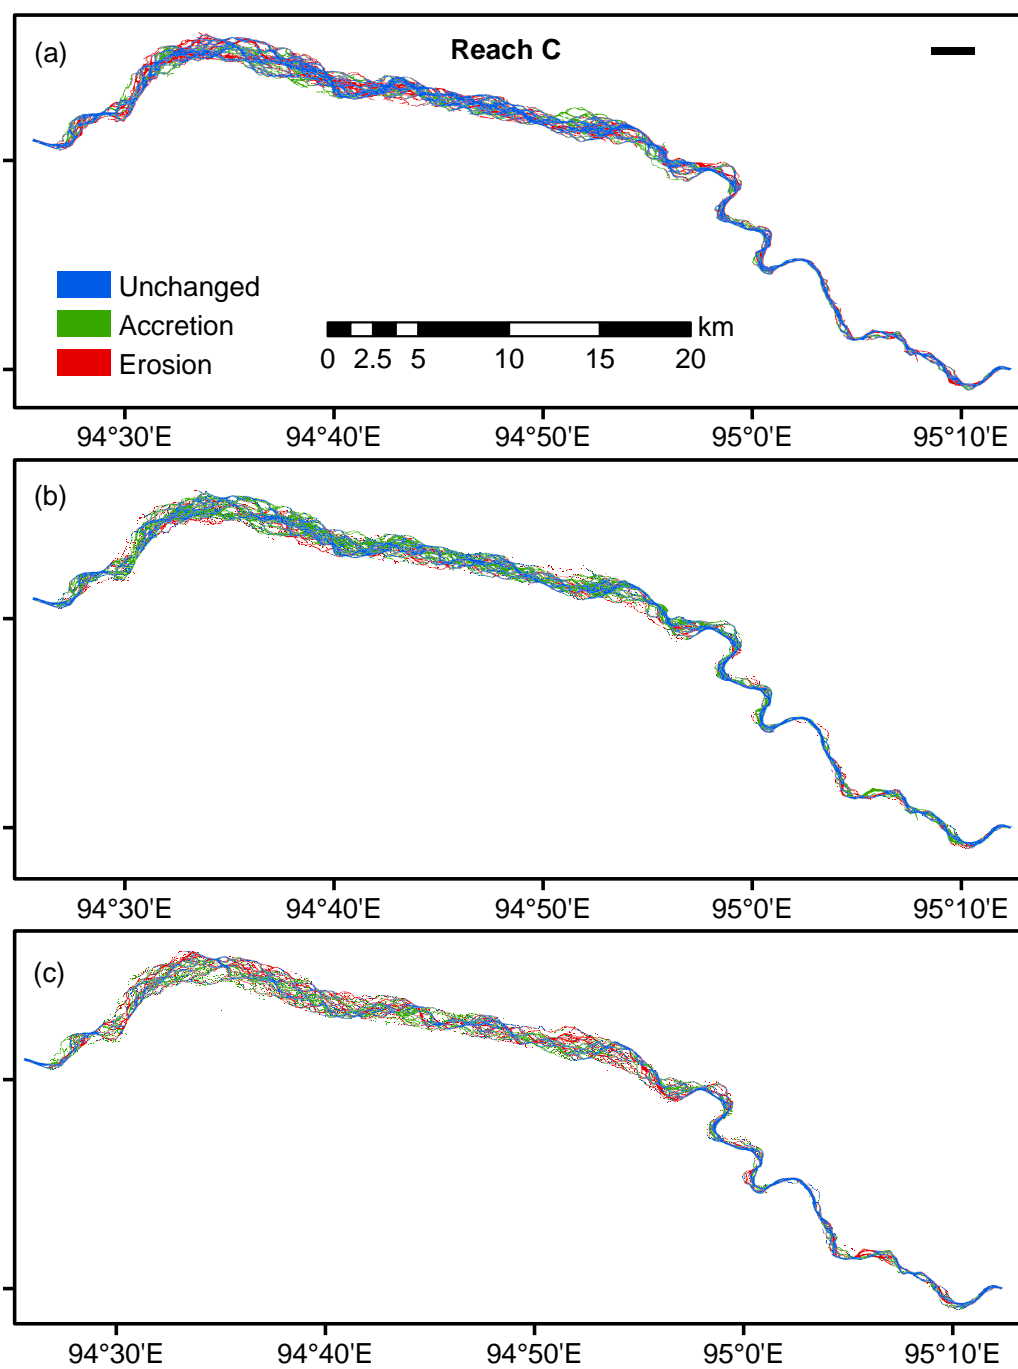

**Figure S3.** (a-c) The same as Figure S1, but for the main braided Reach C.

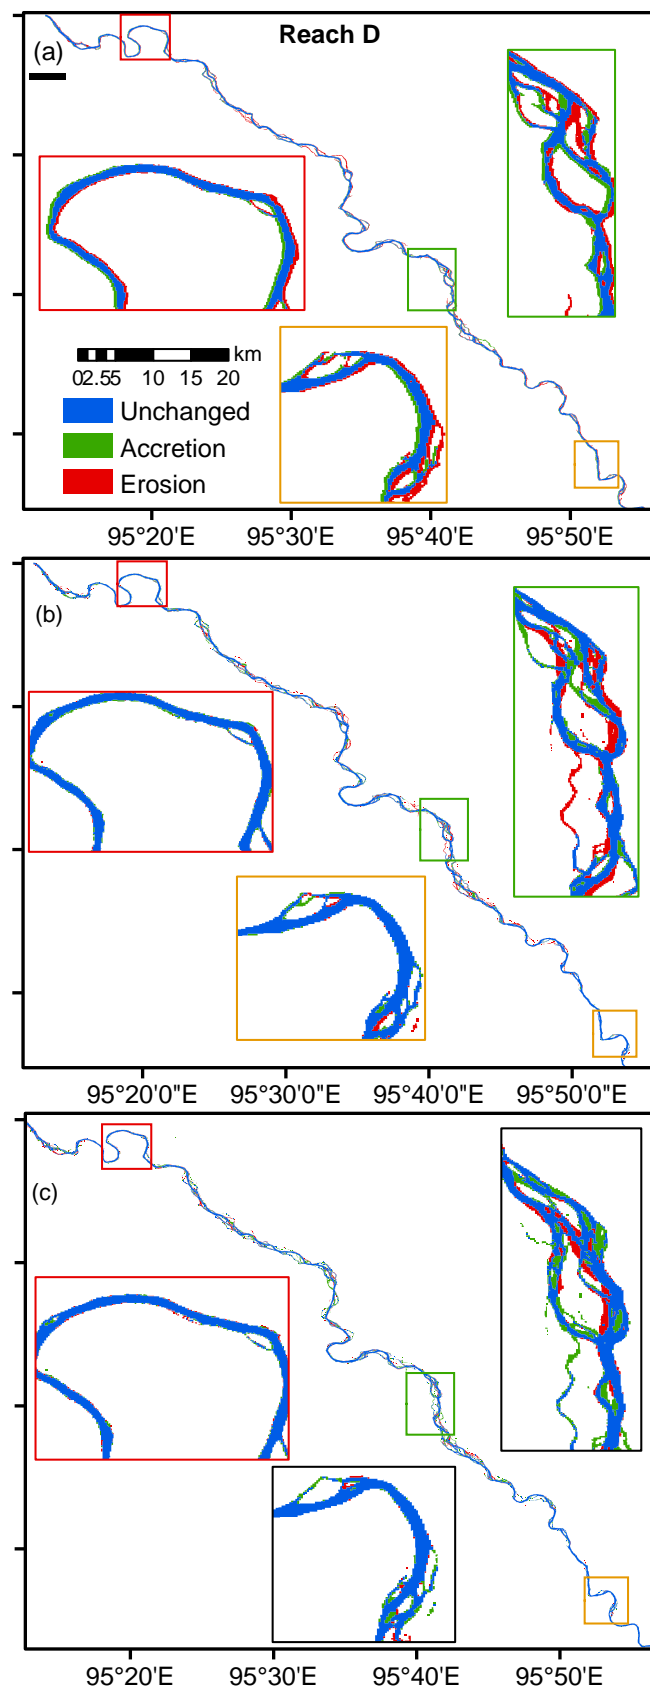

**Figure S4.** (a-c) The same as Figure S1, but for the minor braided Reach D. A local part highlighted in a colored rectangle is enlarged in an inserted map with a rectangle in the same color.

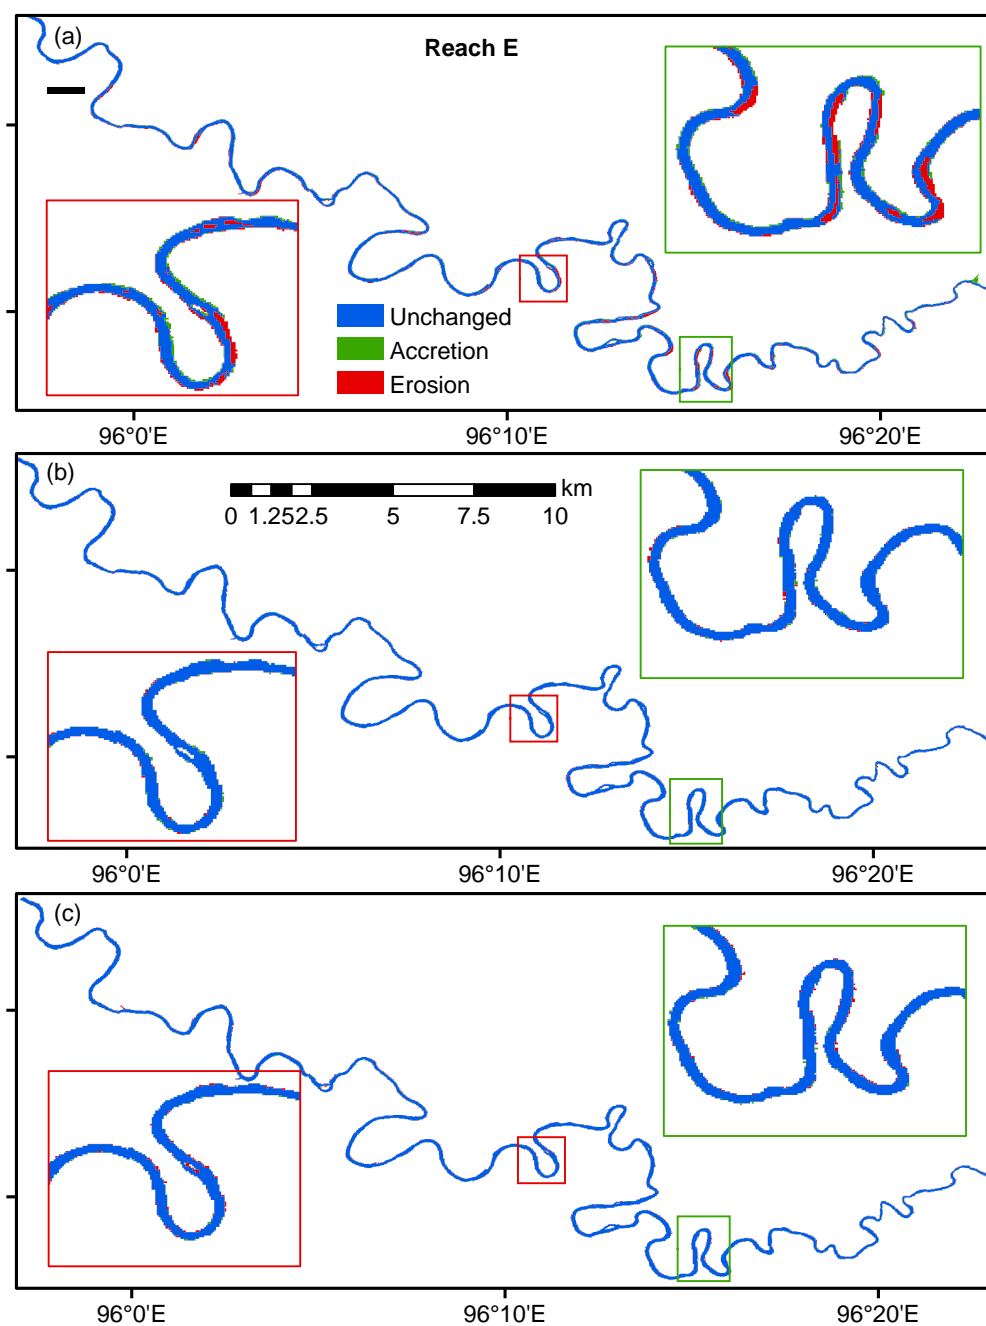

**Figure S5.** (a-c) The same as Figure S4, but for the main meandering Reach E.

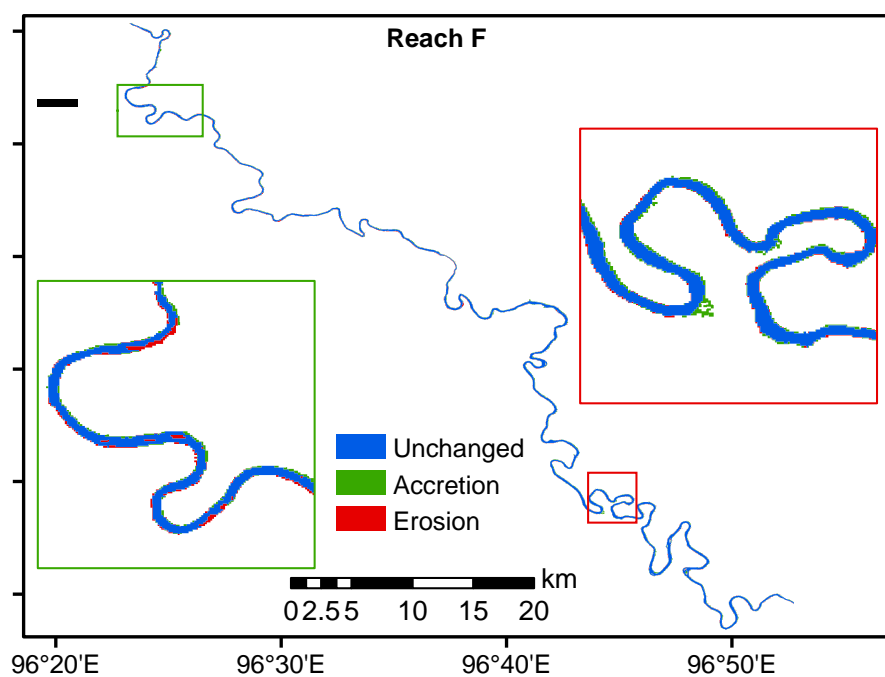

**Figure S6.** The same as Figure S4, but for the main meandering Reach F. Only the map during 1990-2000 is shown here.

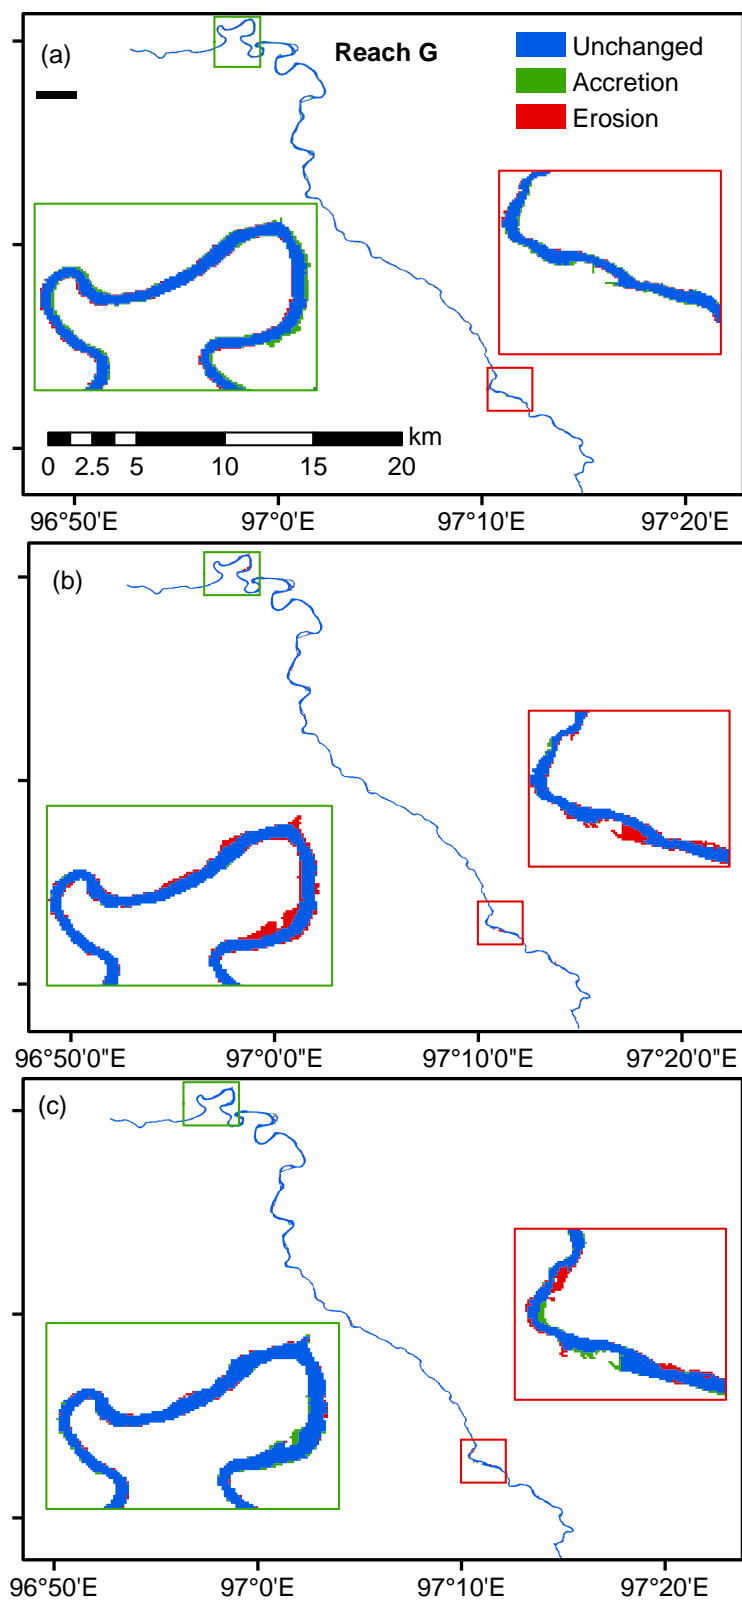

**Figure S7.** (a-c) The same as Figure S4, but for the minor meandering Reach G.
